# Supplementary material for: Evaluation and improvement of the National Early Warning Score (NEWS2) for COVID-19: a multi-hospital study
Source: BMC Med. 2021 Jan 21;19:23. doi: 10.1186/s12916-020-01893-3 (PMC7817348; doi:10.1186/s12916-020-01893-3)
Supplement: Supplementary file 3 — Additional file 3: Table S3. Logistic regression models for each blood and physiological measure tested separately in the KCH training cohort, for 14- and 3-day ICU/death. [file 12916_2020_1893_MOESM3_ESM.xlsx]

## Sheet: Sheet1
Table S3: Logistic regression models for each blood and physiological measure tested separately in the KCH training cohort, for 14- and 3-day ICU/death
			14 day ICU/death						3 day ICU/death
	N avail.		Model 1: Age, sex only1			Model 2: + comorbidities2			Model 1: Age, sex only1			Model 2: + comorbidities2
			Odds Ratio [95% C.I.]	P-value3		Odds Ratio [95% C.I.]	P-value3		Odds Ratio [95% C.I.]	P-value3		Odds Ratio [95% C.I.]	P-value3
NEWS2 score	1262		2.10 [1.83, 2.40]	<0.001		2.13 [1.86, 2.44]	<0.001		2.66 [2.25, 3.16]	<0.001		2.65 [2.23, 3.15]	<0.001
Oxygen flow rate	1271		1.92 [1.70, 2.17]	<0.001		1.97 [1.74, 2.22]	<0.001		2.22 [1.92, 2.56]	<0.001		2.25 [1.94, 2.60]	<0.001
Respiratory rate	1273		1.65 [1.45, 1.86]	<0.001		1.65 [1.45, 1.87]	<0.001		1.83 [1.59, 2.10]	<0.001		1.81 [1.58, 2.09]	<0.001
CRP	1240		1.64 [1.44, 1.87]	<0.001		1.65 [1.45, 1.88]	<0.001		1.89 [1.59, 2.24]	<0.001		1.92 [1.61, 2.28]	<0.001
Lymphocyte/CRP ratio	1196		0.63 [0.55, 0.73]	<0.001		0.63 [0.54, 0.72]	<0.001		0.58 [0.47, 0.71]	<0.001		0.57 [0.47, 0.71]	<0.001
Oxygen saturation	1273		0.65 [0.57, 0.73]	<0.001		0.63 [0.56, 0.72]	<0.001		0.51 [0.44, 0.60]	<0.001		0.49 [0.42, 0.58]	<0.001
Neutrophil count	1220		1.41 [1.25, 1.60]	<0.001		1.42 [1.25, 1.61]	<0.001		1.53 [1.31, 1.80]	<0.001		1.54 [1.31, 1.81]	<0.001
Urea	1221		1.40 [1.23, 1.60]	<0.001		1.42 [1.23, 1.64]	<0.001		1.38 [1.17, 1.63]	<0.001		1.48 [1.23, 1.78]	<0.001
Neutrophil/lymphocyte ratio	1218		1.38 [1.21, 1.57]	<0.001		1.39 [1.21, 1.58]	<0.001		1.44 [1.21, 1.73]	<0.001		1.45 [1.21, 1.74]	<0.001
Heart rate	1273		1.34 [1.18, 1.52]	<0.001		1.35 [1.19, 1.53]	<0.001		1.54 [1.30, 1.82]	<0.001		1.54 [1.30, 1.82]	<0.001
Estimated GFR	1254		0.78 [0.68, 0.88]	<0.001		0.76 [0.66, 0.88]	<0.001		0.87 [0.73, 1.03]	0.125		0.82 [0.67, 1.00]	0.058
Albumin	1153		0.80 [0.70, 0.92]	0.002		0.81 [0.71, 0.92]	0.002		0.76 [0.64, 0.90]	0.002		0.75 [0.63, 0.89]	0.002
Temperature	1273		1.21 [1.07, 1.37]	0.004		1.21 [1.07, 1.38]	0.003		1.23 [1.04, 1.44]	0.018		1.23 [1.05, 1.45]	0.016
Platelet count	1224		0.88 [0.78, 1.01]	0.075		0.88 [0.78, 1.01]	0.08		1.05 [0.89, 1.24]	0.63		1.04 [0.88, 1.23]	0.698
Diastolic blood pressure	1273		0.89 [0.78, 1.00]	0.075		0.89 [0.78, 1.01]	0.08		0.80 [0.67, 0.95]	0.016		0.79 [0.66, 0.94]	0.012
Systolic blood pressure	1273		0.91 [0.81, 1.03]	0.157		0.91 [0.80, 1.03]	0.148		0.95 [0.80, 1.13]	0.625		0.94 [0.79, 1.12]	0.522
Lymphocytes	1221		0.93 [0.82, 1.06]	0.279		0.93 [0.82, 1.06]	0.282		1.01 [0.85, 1.19]	0.942		1.00 [0.84, 1.19]	0.98
Hemoglobin	1223		1.04 [0.92, 1.19]	0.505		1.07 [0.94, 1.22]	0.329		1.20 [1.01, 1.44]	0.052		1.21 [1.00, 1.45]	0.057
Notes.
Continuous predictors were standardised (mean = 0; standard deviation = 1), therefore, odds ratios represent one standard deviation change in the respective parameter, each tested in a separate model. 1Adjusted for age and sex only. 2Additionally adjusted for comorbidities (hypertension, diabetes, heart diseases, respiratory diseases and chronic kidney disease). 3FDR-corrected P-values based on t…
